# Supplementary material
Source: Springer Nature journal article supplement (https://www.springermedizin.de/resource/supplementary/13054_2010_8405_MOESM3_ESM.pdf/9731890)

Predicted Probabilities for CPC 3-5

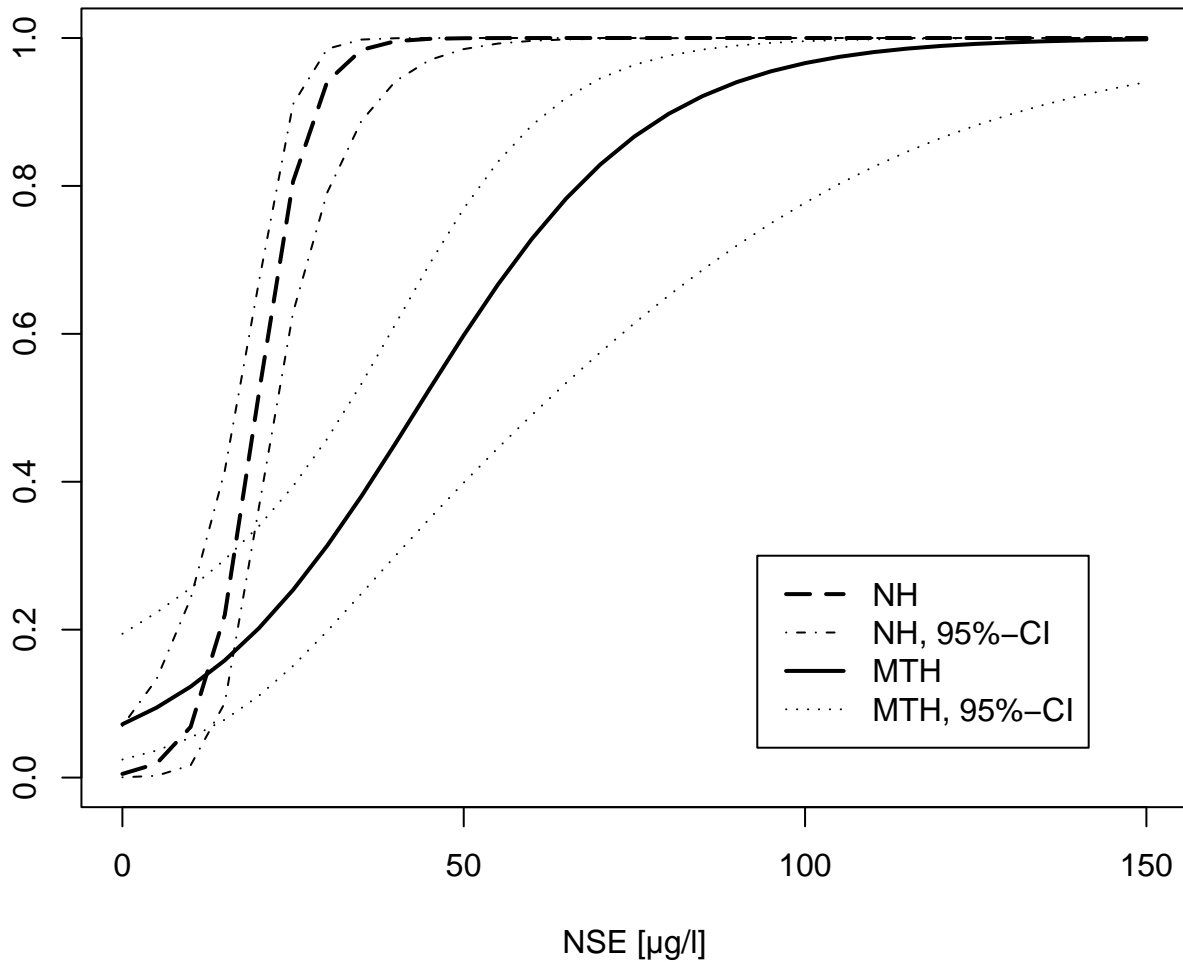

Supplement: MOESM3 [file 9731890]
